# Supplementary material for: Climate and Socioeconomic Factors Drive Irrigated Agriculture Dynamics in the Lower Colorado River Basin
Source: MDPI journal article supplement (doi:10.3390/rs13091659), 2021-04-24
Supplement: s1 [file s1]

## Supplementary Materials: Climate and socioeconomic factors drive irrigated agriculture dynamics in the lower Colorado River Basin

Cynthia L. Norton <sup>1</sup>, Matthew P. Dannenberg <sup>2</sup>, Dong Yan<sup>1</sup>, Cynthia Wallace<sup>3</sup>, Jesus Rodriguez<sup>3</sup>, Seth M. Munson<sup>4</sup>, Willem J.D. van Leeuwen<sup>5</sup>, William K. Smith <sup>1,\*</sup>

|                             | Warm Season | Cool Season      |
|-----------------------------|-------------|------------------|
| INDVI (Growing Season-DOY)  | 97-273      | 1-97 and 273-365 |
| Precipitation (Month)       | 4-9         | 1-5 and 10-12    |
| Average Temperature (Month) | 4-9         | 1-5 and 10-12    |
| VPD (Month)                 | 4-9         | 1-5 and 10-12    |
| Aridity (PPT/PET) (Month)   | 4-9         | 1-5 and 10-12    |

Table S1. Seasonal division of climate variables.

| <b>LCRP</b>              | <b>Active Validation</b> | <b>Fallow Validation</b> | <b>Total</b> |
|--------------------------|--------------------------|--------------------------|--------------|
| Active Classified        | 5531                     | 108                      | 5639         |
| Fallow Classified        | 1546                     | 7672                     | 9218         |
| Total                    | 7077                     | 7780                     | 14857        |
| Kappa Coefficient        |                          |                          | 0.5          |
| <b>Overall Accuracy</b>  |                          |                          | <b>0.89</b>  |
| <b>Commission Error</b>  | 0.22                     | 0.01                     |              |
| <b>Producer Accuracy</b> | 0.78                     | 0.98                     |              |
| <b>Omission Error</b>    | 0.02                     | 0.17                     |              |
| <b>User Accuracy</b>     | 0.98                     | 0.83                     |              |

Table S2. LCRP validation matrix.

| <b>PPAMA</b>      | <b>Active Validation</b> | <b>Fallow Validation</b> | <b>Total</b> |
|-------------------|--------------------------|--------------------------|--------------|
| Active Classified | 3543                     | 378                      | 3921         |
| Fallow Classified | 351                      | 1418                     | 1769         |
| Total             | 3894                     | 1796                     | 5690         |
| Kappa Coefficient |                          |                          | 0.5          |
| Overall Accuracy  |                          |                          | 0.87         |
| Commission Error  | 0.09                     | 0.21                     |              |
| Producer Accuracy | 0.91                     | 0.79                     |              |
| Omission Error    | 0.09                     | 0.19                     |              |
| User Accuracy     | 0.90                     | 0.80                     |              |

Table S3. PPAMA validation matrix.

| <b>LCRP_EXTENT</b> | <b>R</b> | <b>p.value</b> | <b>slope</b> |
|--------------------|----------|----------------|--------------|
| cool_vpd           | -0.522   | 0.019          | -0.008       |
| cool_temp          | -0.468   | 0.033          | -0.013       |
| warm_vpd           | -0.459   | 0.036          | -0.008       |
| warm_pet           | 0.441    | 0.044          | 0.003        |
| warm_temp          | -0.182   | 0.233          | -0.012       |
| cool_pet           | -0.123   | 0.284          | -0.003       |
| warm_ai            | 0.198    | 0.538          | 0.117        |
| warm_ppt           | -0.209   | 0.576          | -0.012       |
| cool_ppt           | 0.247    | 0.787          | 3E-05        |
| cool_ai            | 0.253    | 0.863          | 0.011        |

Table S4. Lower Colorado River planning extent (LCRP\_extent) correlations with warm and cool seasonal climate variables such as vapor pressure deficit (vpd), temperature (temp), precipitation (ppt), potential evapotranspiration (pet) and an aridity index (ai = ppt/pet) . Statistics highlighted orange were used in the main paper.

| <b>PPAMA_EXTENT</b> | <b>R</b> | <b>p.value</b> | <b>slope</b> |
|---------------------|----------|----------------|--------------|
| cool_ai             | 0.459    | 0.036          | 0.118        |
| cool_ppt            | 0.293    | 0.134          | 0.0002       |
| cool_pet            | -0.155   | 0.257          | -0.005       |
| warm_temp           | 0.089    | 0.306          | 0.018        |
| cool_vpd            | -0.2     | 0.545          | -0.005       |
| cool_temp           | 0.2      | 0.562          | 0.007        |
| warm_pet            | 0.22     | 0.636          | 0.001        |
| warm_ai             | -0.25    | 0.716          | -0.055       |
| warm_vpd            | 0.25     | 0.810          | 0.001        |
| warm_ppt            | 0.25     | 0.863          | 0.018        |

Table S5. Pinal and Phoenix active management area extent (PPAMA\_extent) correlations with warm and cool seasonal climate variables such as vapor pressure deficit (vpd), temperature (temp), precipitation (ppt), potential evapotranspiration (pet) and an aridity index (ai = ppt/pet). Statistics highlighted orange were used in the main paper.

| <b>LCRP_iNDVI</b> | <b>R</b> | <b>p.value</b> | <b>slope</b> |
|-------------------|----------|----------------|--------------|
| warm_pet          | -0.727   | 0.001          | -0.006       |
| cool_vpd          | 0.721    | 0.001          | 0.015        |
| cool_temp         | 0.675    | 0.002          | 0.024        |
| cool_pet          | 0.531    | 0.016          | 0.008        |
| warm_vpd          | 0.383    | 0.071          | 0.009        |
| warm_ppt          | 0.344    | 0.097          | 0.004        |
| warm_ai           | 0.134    | 0.273          | 0.275        |
| warm_temp         | 0.243    | 0.754          | 0.004        |
| cool_ai           | -0.245   | 0.771          | -0.025       |
| cool_ppt          | -0.249   | 0.809          | -4E-05       |

Table S6. Lower Colorado River planning iNDVI (LCRP\_iNDVI) correlations with warm and cool seasonal climate variables such as vapor pressure deficit (vpd), temperature (temp), precipitation (ppt), potential evapotranspiration (pet) and an aridity index (ai = ppt/pet) . Statistics highlighted orange were used in the main paper.

| PPAMA_iNDVI | R      | p.value | slope  |
|-------------|--------|---------|--------|
| warm_pet    | -0.646 | 0.003   | -0.007 |
| warm_vpd    | -0.588 | 0.008   | -0.016 |
| warm_ai     | 0.415  | 0.055   | 0.353  |
| warm_ppt    | -0.415 | 0.084   | -0.022 |
| warm_temp   | -0.02  | 0.332   | -0.022 |
| cool_vpd    | -0.10  | 0.359   | -0.009 |
| cool_ppt    | 0.17   | 0.505   | 0.0001 |
| cool_pet    | -0.20  | 0.563   | -0.003 |
| cool_temp   | 0.27   | 0.884   | 0.002  |
| cool_ai     | 0.27   | 0.91    | 0.009  |

Table S7. Pinal and Phoenix active management area iNDVI (PPAMA\_iNDVI) correlations with warm and cool seasonal climate variables such as vapor pressure deficit (vpd), temperature (temp), precipitation (ppt), potential evapotranspiration (pet) and an aridity index (ai = ppt/pet). Statistics highlighted orange were used in the main paper.

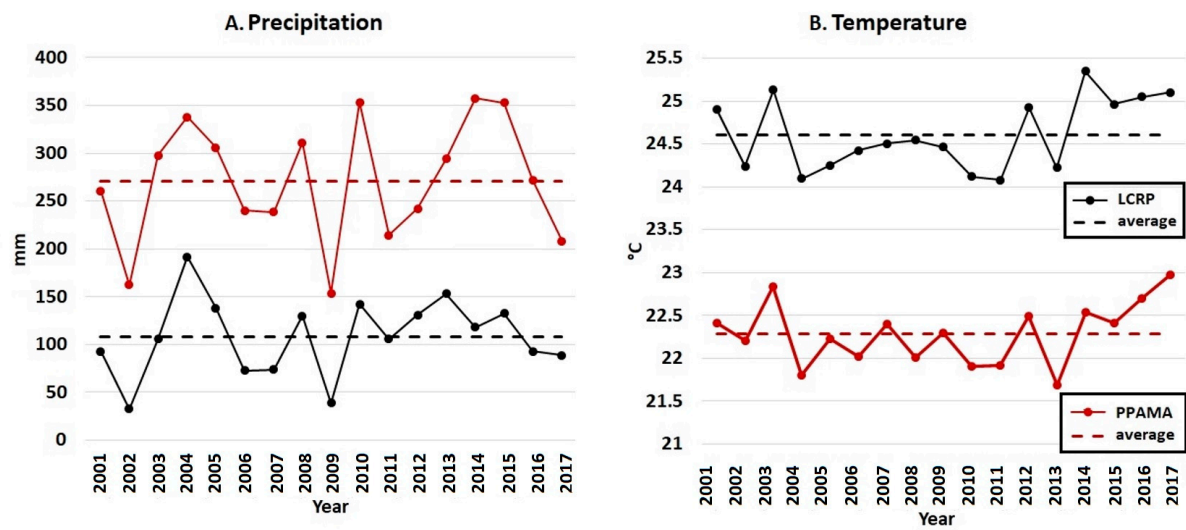

Figure S1. Mean annual precipitation (A) and temperature (B) for both LCRP and PPAMA areas.



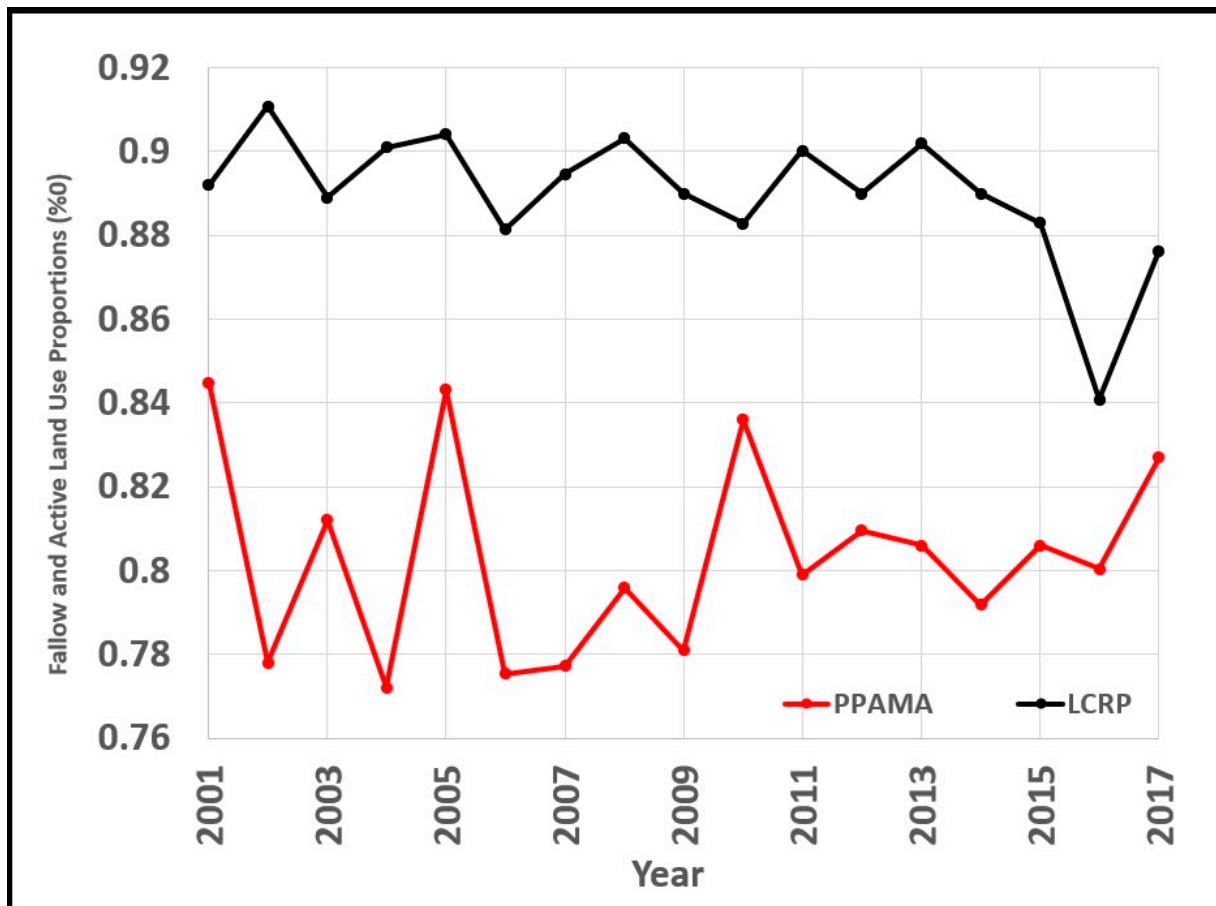

Figure S2. Proportion of active and fallow land for lower Colorado River planning (LCRP) and Pinal and Phoenix active management area (PPAMA) areas. (A) The LCRP shows a higher percentage of active crop during 2001–2017 (A). (B) The PPAMA shows a much lower percentage of active crop from years 2001–2017 and had higher interannual variability (in red).

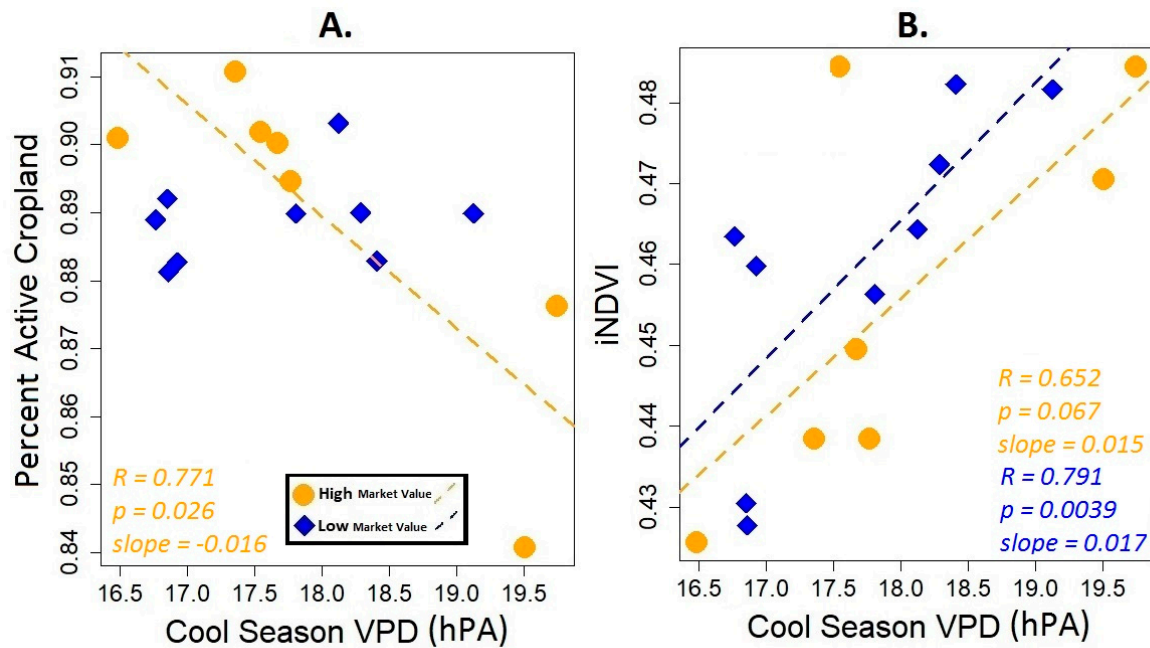

Figure S3. The role of crop market value in the coupling of active cropland extent and active cropland productivity (iNDVI) to climate. (A) LCRP active cropland extent was negatively correlated with cool season vapor pressure deficit during years of high market value (orange circles). (B) LCRP active cropland productivity was most positively correlated with warm season vapor pressure deficit during years of low market value (blue diamonds). Dashed lines show the linear regression fit of the low-market value relationships, which are significant ( $p < 0.05$ ); Correlations and slopes are reported in the plot.
